# Supplementary material for: Microwave-assisted ultrafast synthesis of an iron-based biomolecule-templated nanozyme with augmented peroxidase-mimetic activity
Source: Royal Society of Chemistry journal article supplement (doi:10.1039/d5qm00285k), 2025-01-01
Supplement: d5qm00285k1.pdf [file d5qm00285k1.pdf]

## **Microwave-assisted ultrafast synthesis of iron-based biomolecule-templated nanozyme with augmented peroxidase-mimetic activity**

Ankur Sood<sup>1,2#</sup>, Soonmo Choi<sup>2#</sup>, Suhyeon Han<sup>1</sup>, Sumanta Sahoo<sup>1\*\*</sup>, Sung Soo Han<sup>1,2\*</sup>

<sup>1</sup> *School of Chemical Engineering, Yeungnam University, 280 Daehak-ro, Gyeongsan 38541, South Korea*

<sup>2</sup> *Research Institute of Cell Culture, Yeungnam University, 280 Daehak-ro, Gyeongsan 38541, South Korea*

*# Equal contribution*

Correspondence: **sumanta95@gmail.com** (S.S.); **sshan@yu.ac.kr** (S.S.H.)

### Section S1: Iron content estimation using 1,10 phenanthroline assay

The quantification of total Fe in the fabricated samples (rGO, and GF-(1/2/3)) was performed using the standard 1,10-phenanthroline colorimetric method and calibrated using a standard plot prepared by using Mohr's salt with a concentration range of 1-10 mg/mL<sup>1</sup>.

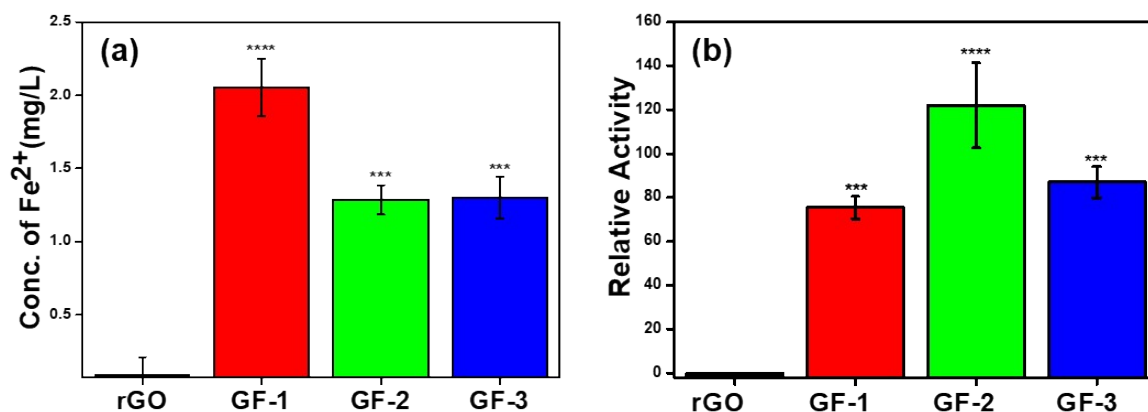

**Figure S1** (a) Total iron content and (b) relative peroxidase activity of the fabricated nanocomposites (GF-1, GF-2, and GF-3) (\*\* P ≤ 0.001, \*\*\* P ≤ 0.0001).

### Section S2: Peroxidase-like activity

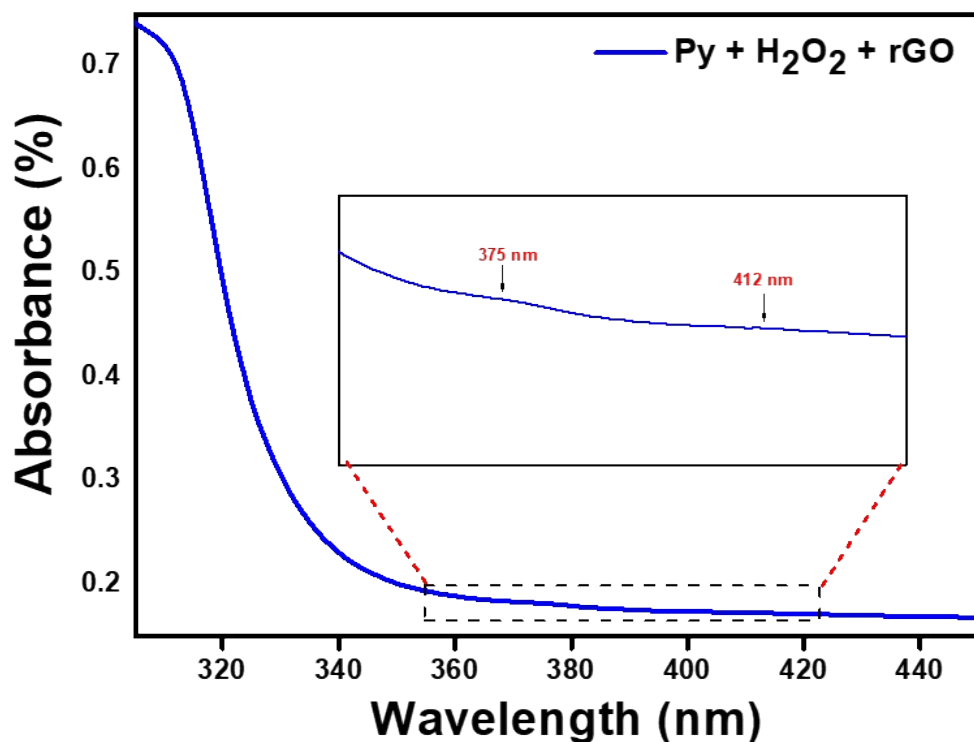

**Figure S2** Peroxidase-like activity of (Py + H<sub>2</sub>O<sub>2</sub> + rGO) treated group.

## References

1. G. Jeffery, J. Basse and J. Mendham, Vogel's TEXTBOOK OF QUANTITATIVE CHEMICAL ANALYSIS FIFTH EDITION Revised/GH Jeffery, B Sc, Ph D, C Chem, FRS CJ Bassett, M Sc, C Chem, FRS CJ Mendham, M Sc, C Chem, MRS CR C Denney, B Sc, Ph D, C Chem, FRSC, MB 1 M, Longman Group UK Limited 1978, 1989, Longman Group UK Limited 1978, 1989, 1989.
